# Supplementary material
Source: ML conference proceedings conference paper supplement (https://proceedings.mlr.press/v115/chowdhury20a.html)
Supplement: Supplementary file [file chowdhury20a-supp.pdf]

---

# Randomized Iterative Algorithms for Fisher Discriminant Analysis (Appendix)

---

## Appendix A PRELIMINARIES

We start by reviewing a result regarding the convergence of a matrix *von Neumann* series for  $(\mathbf{I} - \mathbf{P})^{-1}$ . This will be an important tool in our analysis.

**Proposition 7.** *Let  $\mathbf{P}$  be any square matrix with  $\|\mathbf{P}\|_2 < 1$ . Then  $(\mathbf{I} - \mathbf{P})^{-1}$  exists and*

$$(\mathbf{I} - \mathbf{P})^{-1} = \mathbf{I} + \sum_{\ell=1}^{\infty} \mathbf{P}^{\ell}.$$

## Appendix B EVD-BASED ALGORITHMS FOR FDA

For RFDA, we quote an EVD-based algorithm along with an important result from [36] which together are the building blocks of our iterative framework. Let  $\mathbf{M} \in \mathbb{R}^{c \times c}$  be the matrix such that  $\mathbf{M} = \mathbf{\Omega}^T \mathbf{A} \mathbf{G}$ . Clearly,  $\mathbf{M}$  is symmetric and positive semi-definite.

---

### Algorithm 2 Algorithm for RFDA problem (3)

---

**Input:**  $\mathbf{A} \in \mathbb{R}^{n \times d}$ ,  $\mathbf{\Omega} \in \mathbb{R}^{n \times c}$  and  $\lambda > 0$ ;  
**G**  $\leftarrow (\mathbf{A}^T \mathbf{A} + \lambda \mathbf{I}_d)^{-1} \mathbf{A}^T \mathbf{\Omega}$ ;  
**M**  $\leftarrow \mathbf{\Omega}^T \mathbf{A} \mathbf{G}$ ;  
 Compute thin SVD:  $\mathbf{M} = \mathbf{V}_M \mathbf{\Sigma}_M \mathbf{V}_M^T$ ;  
**Output:**  $\mathbf{X} = \mathbf{G} \mathbf{V}_M$

---

**Theorem 8.** *Using Algorithm 2, let  $\mathbf{X}$  be the solution of problem (3), then we have*

$$\mathbf{X} \mathbf{X}^T = \mathbf{G} \mathbf{G}^T.$$

For any two data points  $\mathbf{w}_1, \mathbf{w}_2 \in \mathbb{R}^d$ , Theorem 8 implies

$$\begin{aligned} (\mathbf{w}_1 - \mathbf{w}_2)^T \mathbf{X} \mathbf{X}^T (\mathbf{w}_1 - \mathbf{w}_2) &= (\mathbf{w}_1 - \mathbf{w}_2)^T \mathbf{G} \mathbf{G}^T (\mathbf{w}_1 - \mathbf{w}_2) \\ \iff \|(\mathbf{w}_1 - \mathbf{w}_2)^T \mathbf{X}\|_2 &= \|(\mathbf{w}_1 - \mathbf{w}_2)^T \mathbf{G}\|_2. \end{aligned}$$

Theorem 8 indicates that if we use any distance-based classification method such as  $k$ -nearest neighbors, both  $\mathbf{X}$  and  $\mathbf{G}$  shares the same property. Thus, we may shift our interest from  $\mathbf{X}$  to  $\mathbf{G}$ .

## Appendix C PROOF OF THEOREM 1

*Proof of Lemma 3.* Using the full SVD representation of  $\mathbf{A}$  we have

$$\begin{aligned} \mathbf{G}^{(j)} &= \mathbf{V}_f \mathbf{\Sigma}_f^T \mathbf{U}_f^T (\mathbf{U}_f \mathbf{\Sigma}_f \mathbf{\Sigma}_f^T \mathbf{U}_f^T + \lambda \mathbf{U}_f \mathbf{U}_f^T)^{-1} \mathbf{L}^{(j)} \\ &= \mathbf{V}_f \mathbf{\Sigma}_f^T (\mathbf{\Sigma}_f \mathbf{\Sigma}_f^T + \lambda \mathbf{I}_n)^{-1} \mathbf{U}_f^T \mathbf{L}^{(j)} \\ &= (\mathbf{V} \quad \mathbf{V}_{\perp}) \begin{pmatrix} \mathbf{\Sigma} & \mathbf{0} \\ \mathbf{0} & \mathbf{0} \end{pmatrix} \left[ \begin{pmatrix} \mathbf{\Sigma}^2 & \mathbf{0} \\ \mathbf{0} & \mathbf{0} \end{pmatrix} + \lambda \mathbf{I}_n \right]^{-1} \begin{pmatrix} \mathbf{U}^T \\ \mathbf{U}_{\perp}^T \end{pmatrix} \mathbf{L}^{(j)} \\ &= (\mathbf{V} \quad \mathbf{V}_{\perp}) \begin{pmatrix} \mathbf{\Sigma} & \mathbf{0} \\ \mathbf{0} & \mathbf{0} \end{pmatrix} \left[ \begin{pmatrix} \mathbf{\Sigma}^2 + \lambda \mathbf{I}_{\rho} & \mathbf{0} \\ \mathbf{0} & \lambda \mathbf{I}_{n-\rho} \end{pmatrix} \right]^{-1} \begin{pmatrix} \mathbf{U}^T \\ \mathbf{U}_{\perp}^T \end{pmatrix} \mathbf{L}^{(j)} \\ &= (\mathbf{V} \quad \mathbf{V}_{\perp}) \begin{pmatrix} \mathbf{\Sigma} & \mathbf{0} \\ \mathbf{0} & \mathbf{0} \end{pmatrix} \begin{pmatrix} (\mathbf{\Sigma}^2 + \lambda \mathbf{I}_{\rho})^{-1} & \mathbf{0} \\ \mathbf{0} & \frac{1}{\lambda} \mathbf{I}_{n-\rho} \end{pmatrix} \begin{pmatrix} \mathbf{U}^T \\ \mathbf{U}_{\perp}^T \end{pmatrix} \mathbf{L}^{(j)} \end{aligned}$$

$$\begin{aligned}
&= (\mathbf{V} \quad \mathbf{V}_\perp) \begin{pmatrix} \boldsymbol{\Sigma}(\boldsymbol{\Sigma}^2 + \lambda \mathbf{I}_\rho)^{-1} & \mathbf{0} \\ \mathbf{0} & \mathbf{0} \end{pmatrix} \begin{pmatrix} \mathbf{U}^\top \\ \mathbf{U}_\perp^\top \end{pmatrix} \mathbf{L}^{(j)} \\
&= \mathbf{V} \boldsymbol{\Sigma} (\boldsymbol{\Sigma}^2 + \lambda \mathbf{I}_\rho)^{-1} \mathbf{U}^\top \mathbf{L}^{(j)} \\
&= \mathbf{V} \boldsymbol{\Sigma} \boldsymbol{\Sigma}^{-1} (\mathbf{I}_\rho + \lambda \boldsymbol{\Sigma}^{-2})^{-1} \boldsymbol{\Sigma}^{-1} \mathbf{U}^\top \mathbf{L}^{(j)} \\
&= \mathbf{V} \boldsymbol{\Sigma}_\lambda^2 \boldsymbol{\Sigma}^{-1} \mathbf{U}^\top \mathbf{L}^{(j)},
\end{aligned} \tag{29}$$

which completes the proof.  $\square$

*Detailed proof of Lemma 4.* First, using SVD of  $\mathbf{A}$ , we express  $\tilde{\mathbf{G}}^{(j)}$  in terms of  $\mathbf{G}^{(j)}$ .

$$\begin{aligned}
\tilde{\mathbf{G}}^{(j)} &= \mathbf{V}_f \boldsymbol{\Sigma}_f^\top \mathbf{U}_f^\top (\mathbf{U}_f \boldsymbol{\Sigma}_f \mathbf{V}_f^\top \mathbf{S} \mathbf{S}^\top \mathbf{V}_f \boldsymbol{\Sigma}_f^\top \mathbf{U}_f^\top + \lambda \mathbf{U}_f \mathbf{U}_f^\top)^{-1} \mathbf{L}^{(j)} \\
&= \mathbf{V}_f \boldsymbol{\Sigma}_f^\top (\boldsymbol{\Sigma}_f \mathbf{V}_f^\top \mathbf{S} \mathbf{S}^\top \mathbf{V}_f \boldsymbol{\Sigma}_f^\top + \lambda \mathbf{I}_n)^{-1} \mathbf{U}_f^\top \mathbf{L}^{(j)} \\
&= (\mathbf{V} \quad \mathbf{V}_\perp) \begin{pmatrix} \boldsymbol{\Sigma} & \mathbf{0} \\ \mathbf{0} & \mathbf{0} \end{pmatrix} \left[ \begin{pmatrix} \boldsymbol{\Sigma} \mathbf{V}^\top \mathbf{S} \mathbf{S}^\top \mathbf{V} \boldsymbol{\Sigma} & \mathbf{0} \\ \mathbf{0} & \mathbf{0} \end{pmatrix} + \lambda \mathbf{I}_n \right]^{-1} \begin{pmatrix} \mathbf{U}^\top \\ \mathbf{U}_\perp^\top \end{pmatrix} \mathbf{L}^{(j)} \\
&= (\mathbf{V} \quad \mathbf{V}_\perp) \begin{pmatrix} \boldsymbol{\Sigma} & \mathbf{0} \\ \mathbf{0} & \mathbf{0} \end{pmatrix} \left[ \begin{pmatrix} \boldsymbol{\Sigma} \mathbf{V}^\top \mathbf{S} \mathbf{S}^\top \mathbf{V} \boldsymbol{\Sigma} + \lambda \mathbf{I}_\rho & \mathbf{0} \\ \mathbf{0} & \lambda \mathbf{I}_{n-\rho} \end{pmatrix} \right]^{-1} \begin{pmatrix} \mathbf{U}^\top \\ \mathbf{U}_\perp^\top \end{pmatrix} \mathbf{L}^{(j)} \\
&= (\mathbf{V} \quad \mathbf{V}_\perp) \begin{pmatrix} \boldsymbol{\Sigma} & \mathbf{0} \\ \mathbf{0} & \mathbf{0} \end{pmatrix} \begin{pmatrix} (\boldsymbol{\Sigma} \mathbf{V}^\top \mathbf{S} \mathbf{S}^\top \mathbf{V} \boldsymbol{\Sigma} + \lambda \mathbf{I}_\rho)^{-1} & \mathbf{0} \\ \mathbf{0} & \frac{1}{\lambda} \mathbf{I}_{n-\rho} \end{pmatrix} \begin{pmatrix} \mathbf{U}^\top \\ \mathbf{U}_\perp^\top \end{pmatrix} \mathbf{L}^{(j)} \\
&= (\mathbf{V} \quad \mathbf{V}_\perp) \begin{pmatrix} \boldsymbol{\Sigma} (\boldsymbol{\Sigma} \mathbf{V}^\top \mathbf{S} \mathbf{S}^\top \mathbf{V} \boldsymbol{\Sigma} + \lambda \mathbf{I}_\rho)^{-1} & \mathbf{0} \\ \mathbf{0} & \mathbf{0} \end{pmatrix} \begin{pmatrix} \mathbf{U}^\top \\ \mathbf{U}_\perp^\top \end{pmatrix} \mathbf{L}^{(j)} \\
&= \mathbf{V} \boldsymbol{\Sigma} (\boldsymbol{\Sigma} \mathbf{V}^\top \mathbf{S} \mathbf{S}^\top \mathbf{V} \boldsymbol{\Sigma} + \lambda \mathbf{I}_\rho)^{-1} \mathbf{U}^\top \mathbf{L}^{(j)}
\end{aligned} \tag{30}$$

$$\begin{aligned}
&= \mathbf{V} \boldsymbol{\Sigma} (\boldsymbol{\Sigma} \boldsymbol{\Sigma}_\lambda^{-1} (\boldsymbol{\Sigma}_\lambda \mathbf{V}^\top \mathbf{S} \mathbf{S}^\top \mathbf{V} \boldsymbol{\Sigma}_\lambda) \boldsymbol{\Sigma}_\lambda^{-1} \boldsymbol{\Sigma} + \lambda \mathbf{I}_\rho)^{-1} \mathbf{U}^\top \mathbf{L}^{(j)} \\
&= \mathbf{V} \boldsymbol{\Sigma} (\boldsymbol{\Sigma} \boldsymbol{\Sigma}_\lambda^{-1} (\boldsymbol{\Sigma}_\lambda^2 + \mathbf{E}) \boldsymbol{\Sigma}_\lambda^{-1} \boldsymbol{\Sigma} + \lambda \mathbf{I}_\rho)^{-1} \mathbf{U}^\top \mathbf{L}^{(j)}
\end{aligned} \tag{31}$$

$$\begin{aligned}
&= \mathbf{V} \boldsymbol{\Sigma} (\boldsymbol{\Sigma} \boldsymbol{\Sigma}_\lambda^{-1} (\boldsymbol{\Sigma}_\lambda^2 + \mathbf{E}) \boldsymbol{\Sigma}_\lambda^{-1} \boldsymbol{\Sigma} + \lambda \boldsymbol{\Sigma} \boldsymbol{\Sigma}_\lambda^{-1} \boldsymbol{\Sigma}_\lambda \boldsymbol{\Sigma}^{-2} \boldsymbol{\Sigma}_\lambda \boldsymbol{\Sigma}_\lambda^{-1} \boldsymbol{\Sigma})^{-1} \mathbf{U}^\top \mathbf{L}^{(j)} \\
&= \mathbf{V} \boldsymbol{\Sigma} (\boldsymbol{\Sigma} \boldsymbol{\Sigma}_\lambda^{-1} (\boldsymbol{\Sigma}_\lambda^2 + \mathbf{E} + \lambda \boldsymbol{\Sigma}_\lambda \boldsymbol{\Sigma}^{-2} \boldsymbol{\Sigma}_\lambda) \boldsymbol{\Sigma}_\lambda^{-1} \boldsymbol{\Sigma})^{-1} \mathbf{U}^\top \mathbf{L}^{(j)} \\
&= \mathbf{V} \boldsymbol{\Sigma} (\boldsymbol{\Sigma} \boldsymbol{\Sigma}_\lambda^{-1} (\mathbf{I}_\rho + \mathbf{E}) \boldsymbol{\Sigma}_\lambda^{-1} \boldsymbol{\Sigma})^{-1} \mathbf{U}^\top \mathbf{L}^{(j)}.
\end{aligned} \tag{32}$$

Eqn. (31) used the fact that  $\boldsymbol{\Sigma}_\lambda \mathbf{V}^\top \mathbf{S} \mathbf{S}^\top \mathbf{V} \boldsymbol{\Sigma}_\lambda = \boldsymbol{\Sigma}_\lambda^2 + \mathbf{E}$ . Eqn. (32) follows from the fact that  $\boldsymbol{\Sigma}_\lambda^2 + \lambda \boldsymbol{\Sigma}_\lambda \boldsymbol{\Sigma}^{-2} \boldsymbol{\Sigma}_\lambda \in \mathbb{R}^{n \times n}$  is a diagonal matrix with  $i$ -th diagonal element

$$(\boldsymbol{\Sigma}_\lambda^2 + \lambda \boldsymbol{\Sigma}_\lambda \boldsymbol{\Sigma}^{-2} \boldsymbol{\Sigma}_\lambda)_{ii} = \frac{\sigma_i^2}{\sigma_i^2 + \lambda} + \frac{\lambda}{\sigma_i^2 + \lambda} = 1,$$

for any  $i = 1 \dots \rho$ . Thus, we have  $(\boldsymbol{\Sigma}_\lambda^2 + \lambda \boldsymbol{\Sigma}_\lambda \boldsymbol{\Sigma}^{-2} \boldsymbol{\Sigma}_\lambda) = \mathbf{I}_\rho$ . Since  $\|\mathbf{E}\|_2 < 1$ , Proposition 7 implies that  $(\mathbf{I}_\rho + \mathbf{E})^{-1}$  exists and

$$(\mathbf{I}_\rho + \mathbf{E})^{-1} = \mathbf{I}_\rho + \sum_{\ell=1}^{\infty} (-1)^\ell \mathbf{E}^\ell = \mathbf{I}_\rho + \mathbf{Q}.$$

Thus, eqn. (32) can further be expressed as

$$\begin{aligned}
\tilde{\mathbf{G}}^{(j)} &= \mathbf{V} \boldsymbol{\Sigma} \boldsymbol{\Sigma}^{-1} \boldsymbol{\Sigma}_\lambda (\mathbf{I}_\rho + \mathbf{E})^{-1} \boldsymbol{\Sigma}_\lambda \boldsymbol{\Sigma}^{-1} \mathbf{U}^\top \mathbf{L}^{(j)} \\
&= \mathbf{V} \boldsymbol{\Sigma}_\lambda (\mathbf{I}_\rho + \mathbf{Q}) \boldsymbol{\Sigma}_\lambda \boldsymbol{\Sigma}^{-1} \mathbf{U}^\top \mathbf{L}^{(j)} \\
&= \mathbf{V} \boldsymbol{\Sigma}_\lambda^2 \boldsymbol{\Sigma}^{-1} \mathbf{U}^\top \mathbf{L}^{(j)} + \mathbf{V} \boldsymbol{\Sigma}_\lambda \mathbf{Q} \boldsymbol{\Sigma}_\lambda \boldsymbol{\Sigma}^{-1} \mathbf{U}^\top \mathbf{L}^{(j)} \\
&= \mathbf{G}^{(j)} + \mathbf{V} \boldsymbol{\Sigma}_\lambda \mathbf{Q} \boldsymbol{\Sigma}_\lambda \boldsymbol{\Sigma}^{-1} \mathbf{U}^\top \mathbf{L}^{(j)},
\end{aligned} \tag{33}$$

where the last line follows from Lemma 3. Further, we have

$$\|\mathbf{Q}\|_2 = \left\| \sum_{\ell=1}^{\infty} (-1)^\ell \mathbf{E}^\ell \right\|_2 \leq \sum_{\ell=1}^{\infty} \|\mathbf{E}^\ell\|_2 \leq \sum_{\ell=1}^{\infty} \|\mathbf{E}\|_2^\ell \leq \sum_{\ell=1}^{\infty} \left(\frac{\varepsilon}{2}\right)^\ell = \frac{\varepsilon/2}{1 - \varepsilon/2} \leq \varepsilon, \tag{34}$$

where we used the triangle inequality, the sub-multiplicativity of the spectral norm, and the fact that  $\varepsilon \leq 1$ . Next, we combine eqns. (33) and (34) to get

$$\begin{aligned}
\|(\mathbf{w} - \mathbf{m})^\top (\tilde{\mathbf{G}}^{(j)} - \mathbf{G}^{(j)})\|_2 &= \|(\mathbf{w} - \mathbf{m})^\top \mathbf{V} \boldsymbol{\Sigma}_\lambda \mathbf{Q} \boldsymbol{\Sigma}_\lambda \boldsymbol{\Sigma}^{-1} \mathbf{U}^\top \mathbf{L}^{(j)}\|_2 \\
&\leq \|(\mathbf{w} - \mathbf{m})^\top \mathbf{V}\|_2 \|\boldsymbol{\Sigma}_\lambda\|_2 \|\mathbf{Q}\|_2 \|\boldsymbol{\Sigma}_\lambda \boldsymbol{\Sigma}^{-1} \mathbf{U}^\top \mathbf{L}^{(j)}\|_2 \\
&\leq \varepsilon \|(\mathbf{w} - \mathbf{m})^\top \mathbf{V}\|_2 \|\boldsymbol{\Sigma}_\lambda \boldsymbol{\Sigma}^{-1} \mathbf{U}^\top \mathbf{L}^{(j)}\|_2 \\
&= \varepsilon \|\mathbf{V} \mathbf{V}^\top (\mathbf{w} - \mathbf{m})\|_2 \|\boldsymbol{\Sigma}_\lambda \boldsymbol{\Sigma}^{-1} \mathbf{U}^\top \mathbf{L}^{(j)}\|_2,
\end{aligned} \tag{35}$$

which completes the proof.  $\square$

The next bound provides a critical inequality that can be used recursively to establish Theorem 1.

*Detailed proof of Lemma 6.* From Algorithm 1, we have for  $j = 1 \dots t - 1$

$$\begin{aligned}
\mathbf{L}^{(j+1)} &= \mathbf{L}^{(j)} - \lambda \mathbf{Y}^{(j)} - \mathbf{A} \tilde{\mathbf{G}}^{(j)} \\
&= \mathbf{L}^{(j)} - (\mathbf{A} \mathbf{A}^\top + \lambda \mathbf{I}_n) (\mathbf{A} \mathbf{S} \mathbf{S}^\top \mathbf{A}^\top + \lambda \mathbf{I}_n)^{-1} \mathbf{L}^{(j)}.
\end{aligned} \tag{36}$$

Now, starting with the full SVD of  $\mathbf{A}$ , we get

$$\begin{aligned}
&(\mathbf{A} \mathbf{A}^\top + \lambda \mathbf{I}_n) (\mathbf{A} \mathbf{S} \mathbf{S}^\top \mathbf{A}^\top + \lambda \mathbf{I}_n)^{-1} \mathbf{L}^{(j)} \\
&= (\mathbf{U}_f \boldsymbol{\Sigma}_f \boldsymbol{\Sigma}_f^\top \mathbf{U}_f^\top + \lambda \mathbf{U}_f \mathbf{U}_f^\top) (\mathbf{U}_f \boldsymbol{\Sigma}_f \mathbf{V}_f^\top \mathbf{S} \mathbf{S}^\top \mathbf{V}_f \boldsymbol{\Sigma}_f^\top \mathbf{U}_f^\top + \lambda \mathbf{U}_f \mathbf{U}_f^\top)^{-1} \mathbf{L}^{(j)} \\
&= \mathbf{U}_f (\boldsymbol{\Sigma}_f \boldsymbol{\Sigma}_f^\top + \lambda \mathbf{I}_n) \mathbf{U}_f^\top \mathbf{U}_f (\boldsymbol{\Sigma}_f \mathbf{V}_f^\top \mathbf{S} \mathbf{S}^\top \mathbf{V}_f \boldsymbol{\Sigma}_f^\top + \lambda \mathbf{I}_n)^{-1} \mathbf{U}_f^\top \mathbf{L}^{(j)} \\
&= \mathbf{U}_f (\boldsymbol{\Sigma}_f \boldsymbol{\Sigma}_f^\top + \lambda \mathbf{I}_n) (\boldsymbol{\Sigma}_f \mathbf{V}_f^\top \mathbf{S} \mathbf{S}^\top \mathbf{V}_f \boldsymbol{\Sigma}_f^\top + \lambda \mathbf{I}_n)^{-1} \mathbf{U}_f^\top \mathbf{L}^{(j)} \\
&= \mathbf{U}_f \begin{pmatrix} \boldsymbol{\Sigma}^2 + \lambda \mathbf{I}_\rho & \mathbf{0} \\ \mathbf{0} & \lambda \mathbf{I}_{n-\rho} \end{pmatrix} \begin{pmatrix} (\boldsymbol{\Sigma} \mathbf{V}^\top \mathbf{S} \mathbf{S}^\top \mathbf{V} \boldsymbol{\Sigma} + \lambda \mathbf{I}_\rho)^{-1} & \mathbf{0} \\ \mathbf{0} & \frac{1}{\lambda} \mathbf{I}_{n-\rho} \end{pmatrix} \mathbf{U}_f^\top \mathbf{L}^{(j)} \\
&= \mathbf{U}_f \begin{pmatrix} (\boldsymbol{\Sigma}^2 + \lambda \mathbf{I}_\rho) (\boldsymbol{\Sigma} \mathbf{V}^\top \mathbf{S} \mathbf{S}^\top \mathbf{V} \boldsymbol{\Sigma} + \lambda \mathbf{I}_\rho)^{-1} & \mathbf{0} \\ \mathbf{0} & \mathbf{I}_{n-\rho} \end{pmatrix} \mathbf{U}_f^\top \mathbf{L}^{(j)} \\
&= (\mathbf{U} \quad \mathbf{U}_\perp) \begin{pmatrix} (\boldsymbol{\Sigma}^2 + \lambda \mathbf{I}_\rho) (\boldsymbol{\Sigma} \mathbf{V}^\top \mathbf{S} \mathbf{S}^\top \mathbf{V} \boldsymbol{\Sigma} + \lambda \mathbf{I}_\rho)^{-1} & \mathbf{0} \\ \mathbf{0} & \mathbf{I}_{n-\rho} \end{pmatrix} \begin{pmatrix} \mathbf{U}^\top \\ \mathbf{U}_\perp^\top \end{pmatrix} \mathbf{L}^{(j)} \\
&= \mathbf{U}_\perp \mathbf{U}_\perp^\top \mathbf{L}^{(j)} + \mathbf{U} (\boldsymbol{\Sigma}^2 + \lambda \mathbf{I}_\rho) (\boldsymbol{\Sigma} \mathbf{V}^\top \mathbf{S} \mathbf{S}^\top \mathbf{V} \boldsymbol{\Sigma} + \lambda \mathbf{I}_\rho)^{-1} \mathbf{U}^\top \mathbf{L}^{(j)} \\
&= \mathbf{U}_\perp \mathbf{U}_\perp^\top \mathbf{L}^{(j)} + \mathbf{U} (\boldsymbol{\Sigma}^2 + \lambda \mathbf{I}_\rho) (\boldsymbol{\Sigma} \boldsymbol{\Sigma}_\lambda^{-1} (\boldsymbol{\Sigma}_\lambda \mathbf{V}^\top \mathbf{S} \mathbf{S}^\top \mathbf{V} \boldsymbol{\Sigma}_\lambda) \boldsymbol{\Sigma}_\lambda^{-1} \boldsymbol{\Sigma} + \lambda \mathbf{I}_\rho)^{-1} \mathbf{U}^\top \mathbf{L}^{(j)} \\
&= \mathbf{U}_\perp \mathbf{U}_\perp^\top \mathbf{L}^{(j)} + \mathbf{U} (\boldsymbol{\Sigma}^2 + \lambda \mathbf{I}_\rho) (\boldsymbol{\Sigma} \boldsymbol{\Sigma}_\lambda^{-1} (\boldsymbol{\Sigma}_\lambda^2 + \mathbf{E}) \boldsymbol{\Sigma}_\lambda^{-1} \boldsymbol{\Sigma} + \lambda \boldsymbol{\Sigma} \boldsymbol{\Sigma}_\lambda^{-1} \boldsymbol{\Sigma}_\lambda \boldsymbol{\Sigma}^{-2} \boldsymbol{\Sigma}_\lambda \boldsymbol{\Sigma}_\lambda^{-1} \boldsymbol{\Sigma})^{-1} \mathbf{U}^\top \mathbf{L}^{(j)} \\
&= \mathbf{U}_\perp \mathbf{U}_\perp^\top \mathbf{L}^{(j)} + \mathbf{U} (\boldsymbol{\Sigma}^2 + \lambda \mathbf{I}_\rho) (\boldsymbol{\Sigma} \boldsymbol{\Sigma}_\lambda^{-1} (\boldsymbol{\Sigma}_\lambda^2 + \mathbf{E} + \lambda \boldsymbol{\Sigma}_\lambda \boldsymbol{\Sigma}^{-2} \boldsymbol{\Sigma}_\lambda) \boldsymbol{\Sigma}_\lambda^{-1} \boldsymbol{\Sigma})^{-1} \mathbf{U}^\top \mathbf{L}^{(j)} \\
&= \mathbf{U}_\perp \mathbf{U}_\perp^\top \mathbf{L}^{(j)} + \mathbf{U} (\boldsymbol{\Sigma}^2 + \lambda \mathbf{I}_\rho) (\boldsymbol{\Sigma} \boldsymbol{\Sigma}_\lambda^{-1} (\mathbf{I}_\rho + \mathbf{E}) \boldsymbol{\Sigma}_\lambda^{-1} \boldsymbol{\Sigma})^{-1} \mathbf{U}^\top \mathbf{L}^{(j)}.
\end{aligned} \tag{37}$$

Here, eqn. (38) holds because  $\boldsymbol{\Sigma}_\lambda \mathbf{V}^\top \mathbf{S} \mathbf{S}^\top \mathbf{V} \boldsymbol{\Sigma}_\lambda = \boldsymbol{\Sigma}_\lambda^2 + \mathbf{E}$  and the fact that  $\boldsymbol{\Sigma}_\lambda^2 + \lambda \boldsymbol{\Sigma}_\lambda \boldsymbol{\Sigma}^{-2} \boldsymbol{\Sigma}_\lambda \in \mathbb{R}^{n \times n}$  is a diagonal matrix whose  $i$ th diagonal element satisfies

$$(\boldsymbol{\Sigma}_\lambda^2 + \lambda \boldsymbol{\Sigma}_\lambda \boldsymbol{\Sigma}^{-2} \boldsymbol{\Sigma}_\lambda)_{ii} = \frac{\sigma_i^2}{\sigma_i^2 + \lambda} + \frac{\lambda}{\sigma_i^2 + \lambda} = 1,$$

for any  $i = 1 \dots \rho$ . Thus, we have  $(\boldsymbol{\Sigma}_\lambda^2 + \lambda \boldsymbol{\Sigma}_\lambda \boldsymbol{\Sigma}^{-2} \boldsymbol{\Sigma}_\lambda) = \mathbf{I}_\rho$ . Since  $\|\mathbf{E}\|_2 < 1$ , Proposition 7 implies that  $(\mathbf{I}_\rho + \mathbf{E})^{-1}$  exists and

$$(\mathbf{I}_\rho + \mathbf{E})^{-1} = \mathbf{I}_\rho + \sum_{\ell=1}^{\infty} (-1)^\ell \mathbf{E}^\ell = \mathbf{I}_\rho + \mathbf{Q},$$

where  $\mathbf{Q} = \sum_{\ell=1}^{\infty} (-1)^\ell \mathbf{E}^\ell$ .

Thus, we rewrite eqn. (38) as

$$(\mathbf{A} \mathbf{A}^\top + \lambda \mathbf{I}_n) (\mathbf{A} \mathbf{S} \mathbf{S}^\top \mathbf{A}^\top + \lambda \mathbf{I}_n)^{-1} \mathbf{L}^{(j)}$$

$$\begin{aligned}
&= \mathbf{U}_\perp \mathbf{U}_\perp^\top \mathbf{L}^{(j)} + \mathbf{U}(\boldsymbol{\Sigma}^2 + \lambda \mathbf{I}_\rho) \boldsymbol{\Sigma}^{-1} \boldsymbol{\Sigma}_\lambda (\mathbf{I}_\rho + \mathbf{E})^{-1} \boldsymbol{\Sigma}_\lambda \boldsymbol{\Sigma}^{-1} \mathbf{U}^\top \mathbf{L}^{(j)} \\
&= \mathbf{U}_\perp \mathbf{U}_\perp^\top \mathbf{L}^{(j)} + \mathbf{U}(\boldsymbol{\Sigma}^2 + \lambda \mathbf{I}_\rho) \boldsymbol{\Sigma}^{-1} \boldsymbol{\Sigma}_\lambda (\mathbf{I}_\rho + \mathbf{Q}) \boldsymbol{\Sigma}_\lambda \boldsymbol{\Sigma}^{-1} \mathbf{U}^\top \mathbf{L}^{(j)} \\
&= \mathbf{U}_\perp \mathbf{U}_\perp^\top \mathbf{L}^{(j)} + \mathbf{U}(\boldsymbol{\Sigma}^2 + \lambda \mathbf{I}_\rho) \boldsymbol{\Sigma}^{-1} \boldsymbol{\Sigma}_\lambda^2 \boldsymbol{\Sigma}^{-1} \mathbf{U}^\top \mathbf{L}^{(j)} + \mathbf{U}(\boldsymbol{\Sigma}^2 + \lambda \mathbf{I}_\rho) \boldsymbol{\Sigma}^{-1} \boldsymbol{\Sigma}_\lambda \mathbf{Q} \boldsymbol{\Sigma}_\lambda \boldsymbol{\Sigma}^{-1} \mathbf{U}^\top \mathbf{L}^{(j)} \\
&= \mathbf{U}_\perp \mathbf{U}_\perp^\top \mathbf{L}^{(j)} + \mathbf{U} \mathbf{U}^\top \mathbf{L}^{(j)} + \mathbf{U}(\boldsymbol{\Sigma}^2 + \lambda \mathbf{I}_\rho) \boldsymbol{\Sigma}^{-1} \boldsymbol{\Sigma}_\lambda \mathbf{Q} \boldsymbol{\Sigma}_\lambda \boldsymbol{\Sigma}^{-1} \mathbf{U}^\top \mathbf{L}^{(j)} \tag{39} \\
&= (\mathbf{U} \mathbf{U}^\top + \mathbf{U}_\perp \mathbf{U}_\perp^\top) \mathbf{L}^{(j)} + \mathbf{U}(\boldsymbol{\Sigma}^2 + \lambda \mathbf{I}_\rho) \boldsymbol{\Sigma}^{-1} \boldsymbol{\Sigma}_\lambda \mathbf{Q} \boldsymbol{\Sigma}_\lambda \boldsymbol{\Sigma}^{-1} \mathbf{U}^\top \mathbf{L}^{(j)} \\
&= \mathbf{U}_f \mathbf{U}_f^\top \mathbf{L}^{(j)} + \mathbf{U}(\boldsymbol{\Sigma}^2 + \lambda \mathbf{I}_\rho) \boldsymbol{\Sigma}^{-1} \boldsymbol{\Sigma}_\lambda \mathbf{Q} \boldsymbol{\Sigma}_\lambda \boldsymbol{\Sigma}^{-1} \mathbf{U}^\top \mathbf{L}^{(j)}. \tag{40}
\end{aligned}$$

Eqn. (39) holds as  $(\boldsymbol{\Sigma}^2 + \lambda \mathbf{I}_\rho) \boldsymbol{\Sigma}^{-1} \boldsymbol{\Sigma}_\lambda^2 \boldsymbol{\Sigma}^{-1} = \mathbf{I}_\rho$ . Further, using the fact that  $\mathbf{U}_f \mathbf{U}_f^\top = \mathbf{I}_n$ , we rewrite eqn. (40) as

$$(\mathbf{A} \mathbf{A}^\top + \lambda \mathbf{I}_n) (\mathbf{A} \mathbf{S} \mathbf{S}^\top \mathbf{A}^\top + \lambda \mathbf{I}_n)^{-1} \mathbf{L}^{(j)} = \mathbf{L}^{(j)} + \mathbf{U}(\boldsymbol{\Sigma}^2 + \lambda \mathbf{I}_\rho) \boldsymbol{\Sigma}^{-1} \boldsymbol{\Sigma}_\lambda \mathbf{Q} \boldsymbol{\Sigma}_\lambda \boldsymbol{\Sigma}^{-1} \mathbf{U}^\top \mathbf{L}^{(j)}. \tag{41}$$

Thus, combining eqns. (36) and (41), we have

$$\mathbf{L}^{(j+1)} = -\mathbf{U}(\boldsymbol{\Sigma}^2 + \lambda \mathbf{I}_\rho) \boldsymbol{\Sigma}^{-1} \boldsymbol{\Sigma}_\lambda \mathbf{Q} \boldsymbol{\Sigma}_\lambda \boldsymbol{\Sigma}^{-1} \mathbf{U}^\top \mathbf{L}^{(j)}. \tag{42}$$

Finally, using eqn. (42), we obtain

$$\begin{aligned}
\|\boldsymbol{\Sigma}_\lambda \boldsymbol{\Sigma}^{-1} \mathbf{U}^\top \mathbf{L}^{(j+1)}\|_2 &= \|\boldsymbol{\Sigma}_\lambda \boldsymbol{\Sigma}^{-1} \mathbf{U}^\top \mathbf{U}(\boldsymbol{\Sigma}^2 + \lambda \mathbf{I}_\rho) \boldsymbol{\Sigma}^{-1} \boldsymbol{\Sigma}_\lambda \mathbf{Q} \boldsymbol{\Sigma}_\lambda \boldsymbol{\Sigma}^{-1} \mathbf{U}^\top \mathbf{L}^{(j)}\|_2 \\
&= \|\boldsymbol{\Sigma}_\lambda \boldsymbol{\Sigma}^{-1} (\boldsymbol{\Sigma}^2 + \lambda \mathbf{I}_\rho) \boldsymbol{\Sigma}^{-1} \boldsymbol{\Sigma}_\lambda \mathbf{Q} \boldsymbol{\Sigma}_\lambda \boldsymbol{\Sigma}^{-1} \mathbf{U}^\top \mathbf{L}^{(j)}\|_2 \\
&= \|\mathbf{Q} \boldsymbol{\Sigma}_\lambda \boldsymbol{\Sigma}^{-1} \mathbf{U}^\top \mathbf{L}^{(j)}\|_2 \leq \|\mathbf{Q}\|_2 \|\boldsymbol{\Sigma}_\lambda \boldsymbol{\Sigma}^{-1} \mathbf{U}^\top \mathbf{L}^{(j)}\|_2 \\
&\leq \varepsilon \|\boldsymbol{\Sigma}_\lambda \boldsymbol{\Sigma}^{-1} \mathbf{U}^\top \mathbf{L}^{(j)}\|_2,
\end{aligned}$$

where the third equality holds as  $\boldsymbol{\Sigma}_\lambda \boldsymbol{\Sigma}^{-1} (\boldsymbol{\Sigma}^2 + \lambda \mathbf{I}_\rho) \boldsymbol{\Sigma}^{-1} \boldsymbol{\Sigma}_\lambda = \mathbf{I}_\rho$  and the last two steps follow from sub-multiplicativity and eqn. (34) respectively. This concludes the proof.  $\square$

**Proof of Theorem 1.** Applying Lemma 6 iteratively, we get

$$\|\boldsymbol{\Sigma}_\lambda \boldsymbol{\Sigma}^{-1} \mathbf{U}^\top \mathbf{L}^{(t)}\|_2 \leq \varepsilon \|\boldsymbol{\Sigma}_\lambda \boldsymbol{\Sigma}^{-1} \mathbf{U}^\top \mathbf{L}^{(t-1)}\|_2 \leq \dots \leq \varepsilon^{t-1} \|\boldsymbol{\Sigma}_\lambda \boldsymbol{\Sigma}^{-1} \mathbf{U}^\top \mathbf{L}^{(1)}\|_2. \tag{43}$$

Now, from eqn (43), we apply sub-multiplicativity to obtain

$$\|\boldsymbol{\Sigma}_\lambda \boldsymbol{\Sigma}^{-1} \mathbf{U}^\top \mathbf{L}^{(1)}\|_2 = \|\boldsymbol{\Sigma}_\lambda \boldsymbol{\Sigma}^{-1} \mathbf{U}^\top \boldsymbol{\Omega}\|_2 \leq \|\boldsymbol{\Sigma}_\lambda \boldsymbol{\Sigma}^{-1}\|_2 \|\mathbf{U}^\top\|_2 \|\boldsymbol{\Omega}\|_2 = \max_{1 \leq i \leq \rho} (\sigma_i^2 + \lambda)^{-\frac{1}{2}} \leq \lambda^{-\frac{1}{2}}, \tag{44}$$

Notice that  $\mathbf{L}^{(1)} = \boldsymbol{\Omega}$  by definition. Also,  $\boldsymbol{\Omega}^\top \boldsymbol{\Omega} = \mathbf{I}_c$  and thus  $\|\boldsymbol{\Omega}\|_2 = 1$ . Furthermore, we know that  $\|\mathbf{U}^\top\|_2 = 1$  and  $\|\boldsymbol{\Sigma}_\lambda \boldsymbol{\Sigma}^{-1}\|_2 = \max_{1 \leq i \leq \rho} (\sigma_i^2 + \lambda)^{-\frac{1}{2}}$  and the last inequality holds since  $(\sigma_i^2 + \lambda)^{-\frac{1}{2}} \leq \lambda^{-\frac{1}{2}}$  for all  $i = 1 \dots \rho$ .

Finally, combining eqns. (22), (43) and (44), we conclude

$$\|(\mathbf{w} - \mathbf{m})^\top (\widehat{\mathbf{G}} - \mathbf{G})\|_2 \leq \frac{\varepsilon^t}{\sqrt{\lambda}} \|\mathbf{V} \mathbf{V}^\top (\mathbf{w} - \mathbf{m})\|_2,$$

which completes the proof.  $\square$

## Appendix D PROOF OF THEOREM 2

**Lemma 9.** For  $j = 1 \dots t$ , let  $\mathbf{L}^{(j)}$  and  $\widetilde{\mathbf{G}}^{(j)}$  be the intermediate matrices in Algorithm 1,  $\mathbf{G}^{(j)}$  be the matrix defined in eqn. (12) and  $\mathbf{R}$  be defined as in Lemma 3. Further, let  $\mathbf{S} \in \mathbb{R}^{d \times s}$  be the sketching matrix and define  $\widehat{\mathbf{E}} = \mathbf{V}^\top \mathbf{S} \mathbf{S}^\top \mathbf{V} - \mathbf{I}_\rho$ . If eqn. (8) is satisfied, i.e.,  $\|\widehat{\mathbf{E}}\|_2 \leq \frac{\varepsilon}{2}$ , then for all  $j = 1, \dots, t$ , we have

$$\|(\mathbf{w} - \mathbf{m})^\top (\widetilde{\mathbf{G}}^{(j)} - \mathbf{G}^{(j)})\|_2 \leq \varepsilon \|\mathbf{V} \mathbf{V}^\top (\mathbf{w} - \mathbf{m})\|_2 \|\mathbf{R}^{-1} \boldsymbol{\Sigma}^{-1} \mathbf{U}^\top \mathbf{L}^{(j)}\|_2, \tag{45}$$

where  $\mathbf{R} = \mathbf{I}_\rho + \lambda \boldsymbol{\Sigma}^{-2}$ .

*Proof.* Note that  $\Sigma_\lambda^2 = \mathbf{R}^{-1}$ . Applying Lemma 3, we can express  $\mathbf{G}^{(j)}$  as

$$\mathbf{G}^{(j)} = \mathbf{V}\mathbf{R}^{-1}\Sigma^{-1}\mathbf{U}^\top\mathbf{L}^{(j)}. \quad (46)$$

Next, rewriting eqn. (30) gives

$$\tilde{\mathbf{G}}^{(j)} = \mathbf{V}\Sigma(\Sigma\mathbf{V}^\top\mathbf{S}\mathbf{S}^\top\mathbf{V}\Sigma + \lambda\mathbf{I}_\rho)^{-1}\mathbf{U}^\top\mathbf{L}^{(j)} \quad (47)$$

$$\begin{aligned} &= \mathbf{V}\Sigma(\Sigma(\mathbf{I}_\rho + \hat{\mathbf{E}})\Sigma + \lambda\mathbf{I}_\rho)^{-1}\mathbf{U}^\top\mathbf{L}^{(j)} = \mathbf{V}\Sigma\Sigma^{-1}(\mathbf{I}_\rho + \hat{\mathbf{E}} + \lambda\Sigma^{-2})^{-1}\Sigma^{-1}\mathbf{U}^\top\mathbf{L}^{(j)} \\ &= \mathbf{V}(\mathbf{R} + \hat{\mathbf{E}})^{-1}\Sigma^{-1}\mathbf{U}^\top\mathbf{L}^{(j)} = \mathbf{V}(\mathbf{R}(\mathbf{I}_\rho + \mathbf{R}^{-1}\hat{\mathbf{E}}))^{-1}\Sigma^{-1}\mathbf{U}^\top\mathbf{L}^{(j)}. \end{aligned} \quad (48)$$

Further, notice that

$$\|\mathbf{R}^{-1}\hat{\mathbf{E}}\|_2 \leq \|\mathbf{R}^{-1}\|_2\|\hat{\mathbf{E}}\|_2 \leq \|\mathbf{R}^{-1}\|_2 \cdot \frac{\varepsilon}{2} = \left(\frac{\sigma_1^2}{\sigma_1^2 + \lambda}\right) \frac{\varepsilon}{2} \leq \frac{\varepsilon}{2} < 1. \quad (49)$$

Now, Proposition 7 implies that  $(\mathbf{I}_\rho + \mathbf{R}^{-1}\hat{\mathbf{E}})^{-1}$  exists. Let  $\hat{\mathbf{Q}} = \sum_{\ell=1}^{\infty} (-1)^\ell (\mathbf{R}^{-1}\hat{\mathbf{E}})^\ell$ , we have

$$(\mathbf{I}_\rho + \mathbf{R}^{-1}\hat{\mathbf{E}})^{-1} = \mathbf{I}_\rho + \sum_{\ell=1}^{\infty} (-1)^\ell (\mathbf{R}^{-1}\hat{\mathbf{E}})^\ell = \mathbf{I}_\rho + \hat{\mathbf{Q}}.$$

Thus, we can rewrite eqn. (48) as

$$\begin{aligned} \tilde{\mathbf{G}}^{(j)} &= \mathbf{V}(\mathbf{I}_\rho + \hat{\mathbf{Q}})\mathbf{R}^{-1}\Sigma^{-1}\mathbf{U}^\top\mathbf{L}^{(j)} \\ &= \mathbf{V}\mathbf{R}^{-1}\Sigma^{-1}\mathbf{U}^\top\mathbf{L}^{(j)} + \mathbf{V}\hat{\mathbf{Q}}\mathbf{R}^{-1}\Sigma^{-1}\mathbf{U}^\top\mathbf{L}^{(j)} \\ &= \mathbf{G}^{(j)} + \mathbf{V}\hat{\mathbf{Q}}\mathbf{R}^{-1}\Sigma^{-1}\mathbf{U}^\top\mathbf{L}^{(j)}, \end{aligned} \quad (50)$$

where eqn. (50) follows eqn. (46). Further, using eqn. (49), we have

$$\|\hat{\mathbf{Q}}\|_2 = \left\| \sum_{\ell=1}^{\infty} (-1)^\ell (\mathbf{R}^{-1}\hat{\mathbf{E}})^\ell \right\|_2 \leq \sum_{\ell=1}^{\infty} \|(\mathbf{R}^{-1}\hat{\mathbf{E}})^\ell\|_2 \leq \sum_{\ell=1}^{\infty} \|\mathbf{R}^{-1}\hat{\mathbf{E}}\|_2^\ell \leq \sum_{\ell=1}^{\infty} \left(\frac{\varepsilon}{2}\right)^\ell = \frac{\varepsilon/2}{1 - \varepsilon/2} \leq \varepsilon, \quad (51)$$

where we used the triangle inequality, sub-multiplicativity of the spectral norm, and the fact that  $\varepsilon \leq 1$ . Next, we combine eqns. (50) and (51) to get

$$\begin{aligned} \|(\mathbf{w} - \mathbf{m})^\top(\tilde{\mathbf{G}}^{(j)} - \mathbf{G}^{(j)})\|_2 &= \|(\mathbf{w} - \mathbf{m})^\top\mathbf{V}\hat{\mathbf{Q}}\mathbf{R}^{-1}\Sigma^{-1}\mathbf{U}^\top\mathbf{L}^{(j)}\|_2 \\ &\leq \|(\mathbf{w} - \mathbf{m})^\top\mathbf{V}\|_2\|\hat{\mathbf{Q}}\|_2\|\mathbf{R}^{-1}\Sigma^{-1}\mathbf{U}^\top\mathbf{L}^{(j)}\|_2 \\ &\leq \varepsilon\|(\mathbf{w} - \mathbf{m})^\top\mathbf{V}\|_2\|\mathbf{R}^{-1}\Sigma^{-1}\mathbf{U}^\top\mathbf{L}^{(j)}\|_2 \\ &= \varepsilon\|(\mathbf{w} - \mathbf{m})^\top\mathbf{V}\mathbf{V}^\top\|_2\|\mathbf{R}^{-1}\Sigma^{-1}\mathbf{U}^\top\mathbf{L}^{(j)}\|_2 \\ &= \varepsilon\|\mathbf{V}\mathbf{V}^\top(\mathbf{w} - \mathbf{m})\|_2\|\mathbf{R}^{-1}\Sigma^{-1}\mathbf{U}^\top\mathbf{L}^{(j)}\|_2, \end{aligned} \quad (52)$$

where the first inequality follows from sub-multiplicativity and the second last equality holds due to the unitary invariance of the spectral norm. This concludes the proof.  $\square$

**Remark 10.** Repeated application of Lemmas 5 and 9 yields:

$$\begin{aligned} \|(\mathbf{w} - \mathbf{m})^\top(\hat{\mathbf{G}} - \mathbf{G})\|_2 &= \|(\mathbf{w} - \mathbf{m})^\top\left(\sum_{j=1}^t \tilde{\mathbf{G}}^{(j)} - \mathbf{G}\right)\|_2 = \|(\mathbf{w} - \mathbf{m})^\top(\tilde{\mathbf{G}}^{(t)} - (\mathbf{G} - \sum_{j=1}^{t-1} \tilde{\mathbf{G}}^{(j)}))\|_2 \\ &= \|(\mathbf{w} - \mathbf{m})^\top(\tilde{\mathbf{G}}^{(t)} - \mathbf{G}^{(t)})\|_2 \leq \varepsilon\|\mathbf{V}\mathbf{V}^\top(\mathbf{w} - \mathbf{m})\|_2\|\mathbf{R}^{-1}\Sigma^{-1}\mathbf{U}^\top\mathbf{L}^{(t)}\|_2. \end{aligned} \quad (53)$$

The next bound provides a critical inequality that can be used recursively in order to establish Theorem 2.

**Lemma 11.** Let  $\mathbf{L}^{(j)}$ ,  $j = 1, \dots, t$ , be the matrices of Algorithm 1 and  $\mathbf{R}$  is as defined in Lemma 3. For any  $j = 1, \dots, t-1$ , define  $\hat{\mathbf{E}} = \mathbf{V}^\top\mathbf{S}\mathbf{S}^\top\mathbf{V} - \mathbf{I}_\rho$ . If eqn. (8) is satisfied i.e.  $\|\hat{\mathbf{E}}\|_2 \leq \frac{\varepsilon}{2}$ , then

$$\|\mathbf{R}^{-1}\Sigma^{-1}\mathbf{U}^\top\mathbf{L}^{(j+1)}\|_2 \leq \varepsilon\|\mathbf{R}^{-1}\Sigma^{-1}\mathbf{U}^\top\mathbf{L}^{(j)}\|_2. \quad (54)$$

*Proof.* From Algorithm 1, we have for  $j = 1, \dots, t-1$ ,

$$\mathbf{L}^{(j+1)} = \mathbf{L}^{(j)} - \lambda \mathbf{Y}^{(j)} - \mathbf{A} \tilde{\mathbf{G}}^{(j)} = \mathbf{L}^{(j)} - (\mathbf{A} \mathbf{A}^\top + \lambda \mathbf{I}_n)(\mathbf{A} \mathbf{S} \mathbf{S}^\top \mathbf{A}^\top + \lambda \mathbf{I}_n)^{-1} \mathbf{L}^{(j)}. \quad (55)$$

Rewriting eqn. (37), we have

$$\begin{aligned} & (\mathbf{A} \mathbf{A}^\top + \lambda \mathbf{I}_n)(\mathbf{A} \mathbf{S} \mathbf{S}^\top \mathbf{A}^\top + \lambda \mathbf{I}_n)^{-1} \mathbf{L}^{(j)} \\ &= \mathbf{U}_\perp \mathbf{U}_\perp^\top \mathbf{L}^{(j)} + \mathbf{U}(\boldsymbol{\Sigma}^2 + \lambda \mathbf{I}_\rho)(\boldsymbol{\Sigma} \mathbf{V}^\top \mathbf{S} \mathbf{S}^\top \mathbf{V} \boldsymbol{\Sigma} + \lambda \mathbf{I}_\rho)^{-1} \mathbf{U}^\top \mathbf{L}^{(j)} \\ &= \mathbf{U}_\perp \mathbf{U}_\perp^\top \mathbf{L}^{(j)} + \mathbf{U}(\boldsymbol{\Sigma}^2 + \lambda \mathbf{I}_\rho)(\boldsymbol{\Sigma}(\mathbf{I}_\rho + \hat{\mathbf{E}})\boldsymbol{\Sigma} + \lambda \mathbf{I}_\rho)^{-1} \mathbf{U}^\top \mathbf{L}^{(j)} \\ &= \mathbf{U}_\perp \mathbf{U}_\perp^\top \mathbf{L}^{(j)} + \mathbf{U}(\boldsymbol{\Sigma}^2 + \lambda \mathbf{I}_\rho) \boldsymbol{\Sigma}^{-1} (\mathbf{I}_\rho + \hat{\mathbf{E}} + \lambda \boldsymbol{\Sigma}^{-2})^{-1} \boldsymbol{\Sigma}^{-1} \mathbf{U}^\top \mathbf{L}^{(j)}. \end{aligned} \quad (56)$$

Here, eqn. (56) holds because  $(\mathbf{I}_\rho + \hat{\mathbf{E}} + \lambda \boldsymbol{\Sigma}^{-2})$  is invertible since it is a positive definite matrix. In addition, using the fact that  $\mathbf{R} = (\mathbf{I}_\rho + \lambda \boldsymbol{\Sigma}^{-2})$ , we rewrite eqn. (56) as

$$\begin{aligned} & (\mathbf{A} \mathbf{A}^\top + \lambda \mathbf{I}_n)(\mathbf{A} \mathbf{S} \mathbf{S}^\top \mathbf{A}^\top + \lambda \mathbf{I}_n)^{-1} \mathbf{L}^{(j)} \\ &= \mathbf{U}_\perp \mathbf{U}_\perp^\top \mathbf{L}^{(j)} + \mathbf{U}(\boldsymbol{\Sigma}^2 + \lambda \mathbf{I}_\rho) \boldsymbol{\Sigma}^{-1} (\mathbf{R} + \hat{\mathbf{E}})^{-1} \boldsymbol{\Sigma}^{-1} \mathbf{U}^\top \mathbf{L}^{(j)} \\ &= \mathbf{U}_\perp \mathbf{U}_\perp^\top \mathbf{L}^{(j)} + \mathbf{U}(\boldsymbol{\Sigma}^2 + \lambda \mathbf{I}_\rho) \boldsymbol{\Sigma}^{-1} \left( \mathbf{R}(\mathbf{I}_\rho + \mathbf{R}^{-1} \hat{\mathbf{E}}) \right)^{-1} \boldsymbol{\Sigma}^{-1} \mathbf{U}^\top \mathbf{L}^{(j)} \\ &= \mathbf{U}_\perp \mathbf{U}_\perp^\top \mathbf{L}^{(j)} + \mathbf{U}(\boldsymbol{\Sigma}^2 + \lambda \mathbf{I}_\rho) \boldsymbol{\Sigma}^{-1} (\mathbf{I}_\rho + \mathbf{R}^{-1} \hat{\mathbf{E}})^{-1} \mathbf{R}^{-1} \boldsymbol{\Sigma}^{-1} \mathbf{U}^\top \mathbf{L}^{(j)} \\ &= \mathbf{U}_\perp \mathbf{U}_\perp^\top \mathbf{L}^{(j)} + \mathbf{U}(\boldsymbol{\Sigma}^2 + \lambda \mathbf{I}_\rho) \boldsymbol{\Sigma}^{-1} (\mathbf{I}_\rho + \hat{\mathbf{Q}}) \mathbf{R}^{-1} \boldsymbol{\Sigma}^{-1} \mathbf{U}^\top \mathbf{L}^{(j)} \\ &= \mathbf{U}_\perp \mathbf{U}_\perp^\top \mathbf{L}^{(j)} + \mathbf{U}(\boldsymbol{\Sigma}^2 + \lambda \mathbf{I}_\rho) \boldsymbol{\Sigma}^{-1} \mathbf{R}^{-1} \boldsymbol{\Sigma}^{-1} \mathbf{U}^\top \mathbf{L}^{(j)} + \mathbf{U}(\boldsymbol{\Sigma}^2 + \lambda \mathbf{I}_\rho) \boldsymbol{\Sigma}^{-1} \hat{\mathbf{Q}} \mathbf{R}^{-1} \boldsymbol{\Sigma}^{-1} \mathbf{U}^\top \mathbf{L}^{(j)} \\ &= (\mathbf{U} \mathbf{U}^\top + \mathbf{U}_\perp \mathbf{U}_\perp^\top) \mathbf{L}^{(j)} + \mathbf{U}(\boldsymbol{\Sigma}^2 + \lambda \mathbf{I}_\rho) \boldsymbol{\Sigma}^{-1} \hat{\mathbf{Q}} \mathbf{R}^{-1} \boldsymbol{\Sigma}^{-1} \mathbf{U}^\top \mathbf{L}^{(j)} \\ &= \mathbf{U}_f \mathbf{U}_f^\top \mathbf{L}^{(j)} + \mathbf{U}(\boldsymbol{\Sigma}^2 + \lambda \mathbf{I}_\rho) \boldsymbol{\Sigma}^{-1} \hat{\mathbf{Q}} \mathbf{R}^{-1} \boldsymbol{\Sigma}^{-1} \mathbf{U}^\top \mathbf{L}^{(j)}. \end{aligned} \quad (57)$$

The second and third equalities follow from Proposition 7 (using eqn. (49)) and the fact that  $\mathbf{R}^{-1}$  exists. Further,  $\hat{\mathbf{Q}}$  is as defined as in Lemma 9. Moreover, the second last equality holds as  $(\boldsymbol{\Sigma}^2 + \lambda \mathbf{I}_\rho) \boldsymbol{\Sigma}^{-1} \mathbf{R}^{-1} \boldsymbol{\Sigma}^{-1} = \mathbf{I}_\rho$ . Now, using the fact that  $\mathbf{U}_f \mathbf{U}_f^\top = \mathbf{I}_n$ , we rewrite eqn. (57) as

$$(\mathbf{A} \mathbf{A}^\top + \lambda \mathbf{I}_n)(\mathbf{A} \mathbf{S} \mathbf{S}^\top \mathbf{A}^\top + \lambda \mathbf{I}_n)^{-1} \mathbf{L}^{(j)} = \mathbf{L}^{(j)} + \mathbf{U}(\boldsymbol{\Sigma}^2 + \lambda \mathbf{I}_\rho) \boldsymbol{\Sigma}^{-1} \hat{\mathbf{Q}} \mathbf{R}^{-1} \boldsymbol{\Sigma}^{-1} \mathbf{U}^\top \mathbf{L}^{(j)}. \quad (58)$$

Thus, combining, eqns. (55) and (58), we have

$$\mathbf{L}^{(j+1)} = -\mathbf{U}(\boldsymbol{\Sigma}^2 + \lambda \mathbf{I}_\rho) \boldsymbol{\Sigma}^{-1} \hat{\mathbf{Q}} \mathbf{R}^{-1} \boldsymbol{\Sigma}^{-1} \mathbf{U}^\top \mathbf{L}^{(j)}. \quad (59)$$

Finally, from eqn. (59), we obtain

$$\begin{aligned} \|\mathbf{R}^{-1} \boldsymbol{\Sigma}^{-1} \mathbf{U}^\top \mathbf{L}^{(j+1)}\|_2 &= \|\mathbf{R}^{-1} \boldsymbol{\Sigma}^{-1} \mathbf{U}^\top \mathbf{U}(\boldsymbol{\Sigma}^2 + \lambda \mathbf{I}_\rho) \boldsymbol{\Sigma}^{-1} \hat{\mathbf{Q}} \mathbf{R}^{-1} \boldsymbol{\Sigma}^{-1} \mathbf{U}^\top \mathbf{L}^{(j)}\|_2 \\ &= \|\mathbf{R}^{-1} \boldsymbol{\Sigma}^{-1} (\boldsymbol{\Sigma}^2 + \lambda \mathbf{I}_\rho) \boldsymbol{\Sigma}^{-1} \hat{\mathbf{Q}} \mathbf{R}^{-1} \boldsymbol{\Sigma}^{-1} \mathbf{U}^\top \mathbf{L}^{(j)}\|_2 \\ &= \|\hat{\mathbf{Q}} \mathbf{R}^{-1} \boldsymbol{\Sigma}^{-1} \mathbf{U}^\top \mathbf{L}^{(j)}\|_2 \leq \|\hat{\mathbf{Q}}\|_2 \|\mathbf{R}^{-1} \boldsymbol{\Sigma}^{-1} \mathbf{U}^\top \mathbf{L}^{(j)}\|_2 \\ &\leq \varepsilon \|\mathbf{R}^{-1} \boldsymbol{\Sigma}^{-1} \mathbf{U}^\top \mathbf{L}^{(j)}\|_2, \end{aligned} \quad (60)$$

where the third equality holds as  $\mathbf{R}^{-1} \boldsymbol{\Sigma}^{-1} (\boldsymbol{\Sigma}^2 + \lambda \mathbf{I}_\rho) \boldsymbol{\Sigma}^{-1} = \mathbf{I}_\rho$  and the last two steps follow from sub-multiplicativity and eqn. (51) respectively. This concludes the proof.  $\square$

**Proof of Theorem 2.** Applying Lemma 11 iteratively, we have

$$\|\mathbf{R}^{-1} \boldsymbol{\Sigma}^{-1} \mathbf{U}^\top \mathbf{L}^{(t)}\|_2 \leq \varepsilon \|\mathbf{R}^{-1} \boldsymbol{\Sigma}^{-1} \mathbf{U}^\top \mathbf{L}^{(t-1)}\|_2 \leq \dots \leq \varepsilon^{t-1} \|\mathbf{R}^{-1} \boldsymbol{\Sigma}^{-1} \mathbf{U}^\top \mathbf{L}^{(1)}\|_2. \quad (61)$$

Now, from eqn (61) and noticing that  $\mathbf{L}^{(1)} = \boldsymbol{\Omega}$  by definition, we have

$$\|\mathbf{R}^{-1} \boldsymbol{\Sigma}^{-1} \mathbf{U}^\top \mathbf{L}^{(1)}\|_2 \leq \|\mathbf{R}^{-1} \boldsymbol{\Sigma}^{-1}\|_2 \|\mathbf{U}^\top\|_2 \|\boldsymbol{\Omega}\|_2 = \max_{1 \leq i \leq \rho} \left\{ \frac{\sigma_i}{\sigma_i^2 + \lambda} \right\} \leq \frac{1}{2\sqrt{\lambda}}, \quad (62)$$

where we used sub-multiplicativity and the facts that  $\|\mathbf{U}^\top\|_2 = 1$ ,  $\boldsymbol{\Omega}^\top \boldsymbol{\Omega} = \mathbf{I}_c$ , and  $\|\boldsymbol{\Omega}\|_2 = 1$ . The last step in eqn. (62) holds since for all  $i = 1 \dots \rho$ ,

$$(\sigma_i - \sqrt{\lambda})^2 \geq 0 \quad \Rightarrow \quad \sigma_i^2 + \lambda \geq 2\sigma_i\sqrt{\lambda} \quad \Rightarrow \quad \frac{\sigma_i}{\sigma_i^2 + \lambda} \leq \frac{1}{2\sqrt{\lambda}}. \quad (63)$$

Finally, combining eqns. (53), (61) and (62), we obtain

$$\|(\mathbf{w} - \mathbf{m})^\top (\hat{\mathbf{G}} - \mathbf{G})\|_2 \leq \frac{\varepsilon^t}{2\sqrt{\lambda}} \|\mathbf{V}\mathbf{V}^\top(\mathbf{w} - \mathbf{m})\|_2,$$

which concludes the proof.  $\square$

## Appendix E SAMPLING-BASED CONSTRUCTIONS

We now discuss how to satisfy the conditions of eqns. (5) or (8) by *sampling*, *i.e.*, selecting a small number of features. Towards that end, consider Algorithm 3 for the construction of the sampling-and-rescaling matrix  $\mathbf{S}$ . Finally, the next result appeared in [6] as Theorem 3 and is a strengthening of Theorem 4.2 of [20], since the sampling complexity  $s$  is improved to depend only on  $\|\mathbf{Z}\|_F^2$  instead of the stable rank of  $\mathbf{Z}$  when  $\|\mathbf{Z}\|_2 \leq 1$ . We also note that Lemma 12 is implicit in [8].

---

### Algorithm 3 Sampling-and-rescaling matrix

---

**Input:** Sampling probabilities  $p_i, i = 1, \dots, d$ ;  
number of sampled columns  $s \ll d$ ;  
 $\mathbf{S} \leftarrow \mathbf{0}_{d \times s}$ ;  
**for**  $t = 1$  **to**  $s$  **do**  
    Pick  $i_t \in \{1, \dots, d\}$  with  $\mathbb{P}(i_t = i) = p_i$ ;  
     $\mathbf{S}_{i_t t} = 1/\sqrt{s p_{i_t}}$ ;  
**end for**  
**Output:** Return  $\mathbf{S}$ ;

---

**Lemma 12.** Let  $\mathbf{Z} \in \mathbb{R}^{d \times n}$  with  $\|\mathbf{Z}\|_2 \leq 1$  and let  $\mathbf{S}$  be constructed by Algorithm 3 with

$$s \geq \frac{8\|\mathbf{Z}\|_F^2}{3\varepsilon^2} \ln \left( \frac{4(1 + \|\mathbf{Z}\|_F^2)}{\delta} \right),$$

then, with probability at least  $1 - \delta$ ,

$$\|\mathbf{Z}^\top \mathbf{S} \mathbf{S}^\top \mathbf{Z} - \mathbf{Z}^\top \mathbf{Z}\|_2 \leq \varepsilon.$$

Applying Lemma 12 with  $\mathbf{Z} = \mathbf{V}\boldsymbol{\Sigma}_\lambda$ , we can satisfy the condition of eqn. (5) using the sampling probabilities  $p_i = \|(\mathbf{V}\boldsymbol{\Sigma}_\lambda)_{i*}\|_2^2/d_\lambda$  (recall that  $\|\mathbf{V}\boldsymbol{\Sigma}_\lambda\|_F^2 = d_\lambda$  and  $\|\mathbf{V}\boldsymbol{\Sigma}_\lambda\|_2 \leq 1$ ). It is easy to see that these probabilities are exactly proportional to the column ridge leverage scores of the design matrix  $\mathbf{A}$ . Setting  $s = \mathcal{O}(\varepsilon^{-2} d_\lambda \ln d_\lambda)$  suffices to satisfy the condition of eqn. (5). We note that approximate ridge leverage scores also suffice and that their computation can be done efficiently without computing  $\mathbf{V}$  [8]. Finally, applying Lemma 12 with  $\mathbf{Z} = \mathbf{V}$  we can satisfy the condition of eqn. (8) by simply using the sampling probabilities  $p_i = \|\mathbf{V}_{i*}\|_2^2/\rho$  (recall that  $\|\mathbf{V}\|_F^2 = \rho$  and  $\|\mathbf{V}\|_2 = 1$ ), which correspond to the column leverage scores of the design matrix  $\mathbf{A}$ . Setting  $s = \mathcal{O}(\varepsilon^{-2} \rho \ln \rho)$  suffices to satisfy the condition of eqn. (8). We note that approximate leverage scores also suffice and that their computation can be done efficiently without computing  $\mathbf{V}$  [13].

## Appendix F SKETCH-SIZE REQUIREMENTS FOR STRUCTURAL CONDITIONS

We provide details on the sketch-size requirements for satisfying the structural conditions of eqns. (5) or (8) when various constructions of the sketching matrix  $\mathbf{S}$  are used. It was shown in [9] that eqn. (11) can be achieved using a count-sketch matrix  $\mathbf{S}$  with  $s = \mathcal{O}(\frac{r}{\delta \varepsilon^2})$  columns or an SRHT matrix  $\mathbf{S}$  with  $s = \mathcal{O}(\varepsilon^{-2}(r + \log(1/\varepsilon\delta)) \log \frac{r}{\delta})$  columns (here,  $\delta$  is the failure probability). As discussed in Section 2.2, setting  $r = d_\lambda$  or  $r = \rho$  in eqn. (11) for eqns. (5) or (8), respectively, we obtain the sketch-size requirements summarized in Table 1.

## Appendix G ADDITIONAL EXPERIMENT RESULTS

Table 2 shows the CPU wall-clock times for running RFDA (on a single-core Intel Xeon E5-2660 CPU at 2.6GHz) by either computing  $\mathbf{G}$  exactly in eqn. (3) or via our iterative algorithm. For both datasets, we report the per-iteration runtime of our algorithm with various sketching-matrix constructions using a sketch size of  $s = 5,000$ .

|          | Count-sketch                                                         | SRHT                                                                                                                    | Sampling (Appendix E)                                                                |
|----------|----------------------------------------------------------------------|-------------------------------------------------------------------------------------------------------------------------|--------------------------------------------------------------------------------------|
| Eqn. (5) | $s = \mathcal{O}\left(\frac{d_\lambda}{\delta \varepsilon^2}\right)$ | $s = \mathcal{O}\left(\frac{d_\lambda + \log(1/\varepsilon\delta)}{\varepsilon^2} \log \frac{d_\lambda}{\delta}\right)$ | $s = \mathcal{O}\left(\frac{d_\lambda \log(d_\lambda/\delta)}{\varepsilon^2}\right)$ |
| Eqn. (8) | $s = \mathcal{O}\left(\frac{\rho}{\delta \varepsilon^2}\right)$      | $s = \mathcal{O}\left(\frac{\rho + \log(1/\varepsilon\delta)}{\varepsilon^2} \log \frac{\rho}{\delta}\right)$           | $s = \mathcal{O}\left(\frac{\rho \log(\rho/\delta)}{\varepsilon^2}\right)$           |

Table 1: Sketch-size requirements for satisfying eqns. (5) or (8) with probability at least  $1 - \delta$ .

| Dataset | SVD    | Exact | Uniform | Leverage | Ridge leverage | Count-sketch |
|---------|--------|-------|---------|----------|----------------|--------------|
| ORL     | 1.335  | 0.232 | 0.101   | 0.101    | 0.101          | 0.103        |
| PEMS    | 35.781 | 3.770 | 0.917   | 0.892    | 0.899          | 0.970        |

Table 2: CPU wall-clock times (in seconds) for RFDA on ORL and PEMS.

As noted in Section 5, we conjecture that using independent sampling matrices in each iteration of Algorithm 1 (*i.e.*, introducing new “randomness” in each iteration) could lead to improved bounds for our main theorems. We evaluate this conjecture empirically by comparing the performance of Algorithm 1 using either a single sketching matrix  $\mathbf{S}$  (the setup in the main paper) or sampling (independently) a new sketching matrix at every iteration  $j$ .

Figure 3 shows the relative approximation error vs. number of iterations on the PEMS dataset for increasing sketch sizes. Figure 4 plots the relative approximation error vs. sketch size after 10 iterations of Algorithm 1 were run. We observe that using a newly sampled sketching matrix at every iteration enables faster convergence as the iterations progress, and also reduces the sketch size  $s$  necessary for Algorithm 1 to converge.

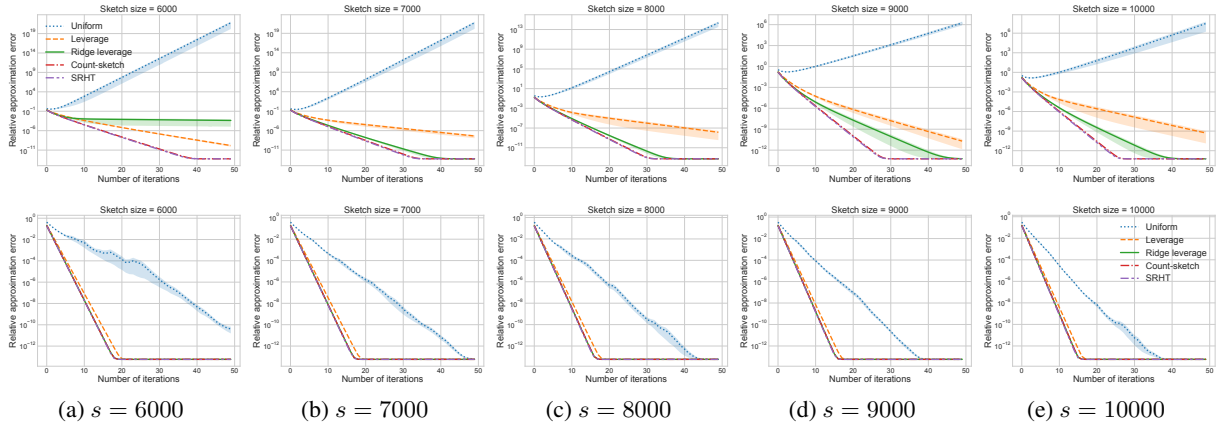

Figure 3: Relative approximation error (on log-scale) vs. number of iterations on PEMS dataset for increasing sketch size  $s$ . *Top row*: using a single sketching matrix  $\mathbf{S}$  throughout. *Bottom row*: sample a new  $\mathbf{S}_j$  at every iteration  $j$ .

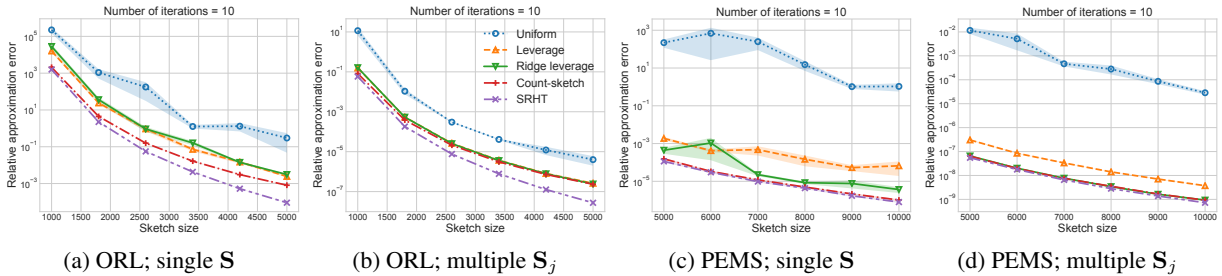

Figure 4: Relative approximation error vs. sketch size on ORL and PEMS after 10 iterations. *Single S*: using a single sketching matrix  $\mathbf{S}$  throughout the iterations. *Multiple S<sub>j</sub>*: sample a new  $\mathbf{S}_j$  at every iteration  $j$ . Errors are on log-scale; note the difference in magnitude of the approximation errors across plots.
